# Supplementary material
Source: publisher site journal article supplement (https://www.dovepress.com/article/495296)
Supplement: Supplementary file 1 [file get_supplementary_file.php]

Supplementary table1. Baseline data of esophageal squamous cell carcinoma patients based on randomized training and validation sets

| Variables | Training cohort | | | P-value | Testing cohort | | | P-value |
| --- | --- | --- | --- | --- | --- | --- | --- | --- |
| Overall(N=1243) | Yes(N=168) | No(N=1075) | Overall(N=533) | Yes(N=61) | No(N=472) |
| Sex (%) |  |  |  |  |  |  |  |  |
| Male | 619 (49.8) | 87 (51.8) | 532 (49.5) | 0.638 | 256 (48.0) | 30 (49.2) | 226 (47.9) | 0.956 |
| Female | 624 (50.2) | 81 (48.2) | 543 (50.5) |  | 277 (52.0) | 31 (50.8) | 246 (52.1) |  |
| Age (median [IQR]),year | 48.00 [36.50, 60.00] | 47.50 [37.00, 59.00] | 48.00 [36.00, 60.00] | 0.919 | 47.00 [38.00, 60.00] | 46.00 [40.00, 58.00] | 48.00 [37.00, 60.25] | 0.936 |
| KPS (%),score |  |  |  |  |  |  |  |  |
| ＜90 | 641 (51.6) | 90 (53.6) | 551 (51.3) | 0.634 | 281 (52.7) | 32 (52.5) | 249 (52.8) | 1 |
| ≥90 | 602 (48.4) | 78 (46.4) | 524 (48.7) |  | 252 (47.3) | 29 (47.5) | 223 (47.2) |  |
| BMI (median [IQR]),kg/m2 | 23.24 [18.04, 29.12] | 23.12 [17.45, 29.31] | 23.28 [18.10, 29.06] | 0.949 | 23.19 [17.32, 29.31] | 23.48 [17.64, 29.83] | 23.16 [17.27, 29.16] | 0.633 |
| Tumor location (%) |  |  |  |  |  |  |  |  |
| Upper | 399 (32.1) | 44 (26.2) | 355 (33.0) | 0.179 | 179 (33.6) | 17 (27.9) | 162 (34.3) | 0.289 |
| Middle | 430 (34.6) | 66 (39.3) | 364 (33.9) |  | 166 (31.1) | 17 (27.9) | 149 (31.6) |  |
| Lower | 414 (33.3) | 58 (34.5) | 356 (33.1) |  | 188 (35.3) | 27 (44.3) | 161 (34.1) |  |
| T stage(%) |  |  |  |  |  |  |  |  |
| T1~T2 | 621 (50.0) | 90 (53.6) | 531 (49.4) | 0.356 | 259 (48.6) | 28 (45.9) | 231 (48.9) | 0.756 |
| T3~T4 | 622 (50.0) | 78 (46.4) | 544 (50.6) |  | 274 (51.4) | 33 (54.1) | 241 (51.1) |  |
| N stage(%) |  |  |  |  |  |  |  |  |
| N0~N1 | 608 (48.9) | 86 (51.2) | 522 (48.6) | 0.581 | 258 (48.4) | 28 (45.9) | 230 (48.7) | 0.78 |
| N2~N3 | 635 (51.1) | 82 (48.8) | 553 (51.4) |  | 275 (51.6) | 33 (54.1) | 242 (51.3) |  |
| TNM (%) |  |  |  |  |  |  |  |  |
| I~II | 658 (52.9) | 92 (54.8) | 566 (52.7) | 0.67 | 278 (52.2) | 40 (65.6) | 238 (50.4) | 0.036 |
| III~IV | 585 (47.1) | 76 (45.2) | 509 (47.3) |  | 255 (47.8) | 21 (34.4) | 234 (49.6) |  |
| NLYM (median [IQR]) | 64.00 [40.00, 86.50] | 59.00 [40.00, 80.00] | 64.00 [41.00, 88.00] | 0.03 | 66.00 [40.00, 89.00] | 74.00 [45.00, 89.00] | 66.00 [39.75, 88.25] | 0.287 |
| VI (%) |  |  |  |  |  |  |  |  |
| Yes | 384 (30.9) | 124 (73.8) | 260 (24.2) | <0.001 | 168 (31.5) | 49 (80.3) | 119 (25.2) | <0.001 |
| No | 859 (69.1) | 44 (26.2) | 815 (75.8) |  | 365 (68.5) | 12 (19.7) | 353 (74.8) |  |
| PI (%) |  |  |  |  |  |  |  |  |
| Yes | 599 (48.2) | 76 (45.2) | 523 (48.7) | 0.459 | 273 (51.2) | 29 (47.5) | 244 (51.7) | 0.635 |
| No | 644 (51.8) | 92 (54.8) | 552 (51.3) |  | 260 (48.8) | 32 (52.5) | 228 (48.3) |  |
| MI (%) |  |  |  |  |  |  |  |  |
| Yes | 561 (45.1) | 149 (88.7) | 412 (38.3) | <0.001 | 257 (48.2) | 55 (90.2) | 202 (42.8) | <0.001 |
| No | 682 (54.9) | 19 (11.3) | 663 (61.7) |  | 276 (51.8) | 6 (9.8) | 270 (57.2) |  |
| Surgery (%) |  |  |  |  |  |  |  |  |
| Open | 212 (17.1) | 133 (79.2) | 79 (7.3) | <0.001 | 89 (16.7) | 53 (86.9) | 36 (7.6) | <0.001 |
| Laparoscope | 1031 (82.9) | 35 (20.8) | 996 (92.7) |  | 444 (83.3) | 8 (13.1) | 436 (92.4) |  |
| AS (%) |  |  |  |  |  |  |  |  |
| Neck | 629 (50.6) | 81 (48.2) | 548 (51.0) | 0.56 | 270 (50.7) | 27 (44.3) | 243 (51.5) | 0.355 |
| Chest or abdomen | 614 (49.4) | 87 (51.8) | 527 (49.0) |  | 263 (49.3) | 34 (55.7) | 229 (48.5) |  |
| PT (%) |  |  |  |  |  |  |  |  |
| Yes | 731 (58.8) | 27 (16.1) | 704 (65.5) | <0.001 | 340 (63.8) | 12 (19.7) | 328 (69.5) | <0.001 |
| No | 512 (41.2) | 141 (83.9) | 371 (34.5) |  | 193 (36.2) | 49 (80.3) | 144 (30.5) |  |
| Feature1 (median [IQR]) | 3.81 [3.06, 4.67] | 8.67 [7.14, 10.05] | 3.64 [2.95, 4.30] | <0.001 | 3.84 [3.09, 4.55] | 8.11 [6.45, 9.98] | 3.65 [2.97, 4.32] | <0.001 |
| Feature2 (median [IQR]) | 2.95 [2.31, 3.64] | 1.44 [1.17, 1.64] | 3.13 [2.58, 3.74] | <0.001 | 2.96 [2.33, 3.58] | 1.38 [1.08, 1.63] | 3.13 [2.52, 3.69] | <0.001 |
| Feature3 (median [IQR]) | 5.78 [4.57, 7.03] | 2.39 [1.80, 3.07] | 6.14 [5.08, 7.27] | <0.001 | 5.91 [4.76, 7.16] | 2.38 [1.80, 2.92] | 6.25 [5.14, 7.31] | <0.001 |
| Feature4 (median [IQR]) | 3.01 [2.59, 3.50] | 3.00 [2.60, 3.50] | 3.01 [2.58, 3.50] | 0.691 | 3.11 [2.62, 3.54] | 3.13 [2.65, 3.49] | 3.11 [2.62, 3.55] | 0.883 |
| Feature5 (median [IQR]) | 8.13 [7.05, 9.25] | 31.33 [21.87, 39.45] | 7.82 [6.95, 8.78] | <0.001 | 8.15 [7.14, 9.17] | 28.29 [22.75, 40.20] | 7.90 [7.00, 8.81] | <0.001 |
| Feature6 (median [IQR]) | 3.13 [1.94, 4.16] | 0.75 [0.33, 1.11] | 3.44 [2.35, 4.31] | <0.001 | 3.20 [2.08, 4.16] | 0.61 [0.27, 1.13] | 3.41 [2.42, 4.25] | <0.001 |
| Feature7 (median [IQR]) | 43.40 [32.75, 55.22] | 43.97 [32.80, 54.34] | 43.39 [32.70, 55.34] | 0.996 | 43.56 [33.17, 55.36] | 43.39 [32.48, 56.09] | 43.65 [33.30, 55.04] | 0.988 |

Abbreviations:IQR= Interquartile range;KPS=Karnofsky Performance Status Score;BMI=Body Mass Index;TNM=Tumor node metastasis classification;NLYM=Number of lymph node dissections;VI=Vascular invasion;PI=Perineural invasion;MI=Multifocal lesions;AS=Anastomotic site;PT=Preoperativetreatment;Feature1=Granularity_5_OrigGray;Feature2=StDev_IdentifySecondaryObjectives_AreaShape_BoundingBoxMinimum_Y;Feature3=StDev_IdentifySecondaryObjects_AreaShape_Zernike_6_2;Feature4=StDev_IdentifySecondaryObjects_Texture_Contrast_Hematoxylin_3_03_256;Feature5=ExecutionTime_09MeasureGranularity;Feature6=Correlation_Slope_Eosin_OrigGray;Feature7=Granularity_6_Eosin.
